# Supplementary material
Source: publisher figshare collection journal article supplement (https://acs.figshare.com/ndownloader/files/9109732)
Supplement: Supplementary file 1 [file 9109732]

Compound_ID	SMILES	T24 IC50(¦ÌM)	HepG2 IC50(¦ÌM)	NCI-H460 IC50(¦ÌM)	MGC-803 IC50(¦ÌM)	HeLa IC50(¦ÌM)
5aa	O=C2N3C(C(C=CC=C4)=C4C(NCCN(C)C)=N3)=NC1=CC=CC=C12	7.47¡À1.62	10.24¡À2.41	12.13¡À3.36	8.71¡À2.06	12.96¡À3.11
5ab	CN(C)CCCNC3=NN2C(C4=C3C=CC=C4)=NC1=CC=CC=C1C2=O	4.62¡À0.80	4.68¡À1.07	7.49¡À1.41	6.60¡À2.21	7.92¡À1.26
5ac	O=C2N3C(C(C=CC=C4)=C4C(NCCCN5CCOCC5)=N3)=NC1=CC=CC=C12	3.46¡À0.41	4.89¡À0.84	5.11¡À0.72	4.82¡À0.41	5.60¡À1.12
5ad	O=C2N3C(C(C=CC=C4)=C4C(N5CCOCC5)=N3)=NC1=CC=CC=C12	3.09¡À0.31	3.80¡À0.74	5.03¡À0.55	4.29¡À0.72	6.10¡À1.48
5ae	O=C2N(N=C(N5CCN(C)CC5)C4=C3C=CC=C4)C3=NC1=CC=CC=C12	2.12¡À0.24	4.97¡À1.17	5.69¡À1.33	5.65¡À1.13	3.41¡À1.06
5ba	O=C2N3C(C(C=CC=C4)=C4C(NCCN(C)C)=N3)=NC1=CC=C(F)C=C12	14.54¡À2.93	11.46¡À2.86	16.97¡À4.10	10.66¡À1.83	20.19¡À5.42
5bb	O=C2N3C(C(C=CC=C4)=C4C(NCCCN(C)C)=N3)=NC1=CC=C(F)C=C12	8.90¡À1.93	10.69¡À2.38	11.18¡À2.24	32.15¡À5.66	22.09¡À5.06
5bc	O=C2N3C(C(C=CC=C4)=C4C(NCCCN5CCOCC5)=N3)=NC1=CC=C(F)C=C12	9.83¡À1.56	8.78¡À1.62	10.5¡À2.44	13.88¡À2.14	15.65¡À3.09
5bd	O=C2N3C(C(C=CC=C4)=C4C(N5CCOCC5)=N3)=NC1=CC=C(F)C=C12	3.25¡À0.33	2.20¡À0.31	5.48¡À1.18	3.35¡À0.56	7.13¡À1.64
5be	O=C2N3C(C(C=CC=C4)=C4C(N5CCN(C)CC5)=N3)=NC1=CC=C(F)C=C12	7.28¡À2.08	7.82¡À1.92	9.70¡À2.30	5.24¡À1.17	13.62¡À3.94
5ca	O=C2N3C(C(C=CC=C4)=C4C(NCCN(C)C)=N3)=NC1=CC=C(Cl)C=C12	27.95¡À5.19	30.48¡À5.81	40.19¡À7.15	14.49¡À1.93	53.82¡À9.01
5cb	O=C2N3C(C(C=CC=C4)=C4C(NCCCN(C)C)=N3)=NC1=CC=C(Cl)C=C12	18.84¡À4.18	45.09¡À8.87	52.02¡À10.20	79.08¡À14.02	60.58¡À11.13
5cc	O=C2N3C(C(C=CC=C4)=C4C(NCCCN5CCOCC5)=N3)=NC1=CC=C(Cl)C=C12	8.85¡À2.12	18.34¡À2.65	19.93¡À2.43	23.14¡À4.69	34.56¡À6.70
5cd	O=C2N3C(C(C=CC=C4)=C4C(N5CCOCC5)=N3)=NC1=CC=C(Cl)C=C12	9.03¡À2.05	12.82¡À3.26	15.07¡À3.90	7.21¡À1.24	17.40¡À4.64
5ce	O=C2N3C(C(C=CC=C4)=C4C(N5CCN(C)CC5)=N3)=NC1=CC=C(Cl)C=C12	9.78¡À1.64	24.09¡À5.12	21.61¡À4.12	20.67¡À4.20	24.23¡À5.86
5da	O=C2N3C(C(C=CC=C4)=C4C(NCCN(C)C)=N3)=NC1=CC=C(Br)C=C12	>100	92.29¡À19.60	>100	>100	>100
5db	O=C2N3C(C(C=CC=C4)=C4C(NCCCN(C)C)=N3)=NC1=CC=C(Br)C=C12	>100	>100	>100	>100	>100
5dc	O=C2N3C(C(C=CC=C4)=C4C(NCCCN5CCOCC5)=N3)=NC1=CC=C(Br)C=C12	>100	>100	>100	>100	>100
5dd	O=C2N3C(C(C=CC=C4)=C4C(N5CCOCC5)=N3)=NC1=CC=C(Br)C=C12	>100	>100	>100	>100	>100
5de	O=C2N3C(C(C=CC=C4)=C4C(N5CCN(C)CC5)=N3)=NC1=CC=C(Br)C=C12	>100	>100	>100	>100	>100
5ea	CN(C)CCNC3=NN2C(C4=C3C=CC=C4)=NC1=CC=C(C)C=C1C2=O	33.81¡À6.68	39.42¡À8.03	31.35¡À5.47	44.45¡À7.20	50.38¡À9.94
5eb	CC1=CC=C(N=C3N2N=C(NCCCN(C)C)C4=C3C=CC=C4)C(C2=O)=C1	34.84¡À6.22	51.89¡À11.01	77.72¡À14.41	26.11¡À7.06	44.89¡À10.07
5ec	O=C2N3C(C4=C(C=CC=C4)C(NCCCN5CCOCC5)=N3)=NC1=CC=C(C)C=C12	30.73¡À8.06	57.56¡À12.22	70.36¡À16.28	66.14¡À14.30	>100
5ed	O=C2N3C(C(C=CC=C4)=C4C(N5CCOCC5)=N3)=NC1=CC=C(C)C=C12	77.02¡À15.28	41.13¡À8.71	43.70¡À9.07	40.39¡À6.71	73.5¡À14.33
5ee	CC1=CC=C(N=C(C(C=CC=C4)=C4C(N5CCN(C)CC5)=N3)N3C2=O)C2=C1	60.48¡À12.38	55.19¡À13.61	70.56¡À16.64	34.18¡À5.19	85.00¡À19.88
5df	O=C2N3C(C(C=CC=C4)=C4C(NCCN(CC)CC)=N3)=NC1=CC=C(Br)C=C12	10.69¡À2.47	2.99¡À0.31	5.06¡À1.74	7.26¡À1.39	8.81¡À2.66
5dg	O=C2N3C(C(C=CC=C4)=C4C(NCCN(C(C)C)C(C)C)=N3)=NC1=CC=C(Br)C=C12	12.71¡À2.76	11.68¡À2.18	13.61¡À2.47	10.60¡À2.11	11.38¡À2.57
5dh	O=C2N3C(C(C=CC=C4)=C4C(NCCN5CCCC5)=N3)=NC1=CC=C(Br)C=C12	6.43¡À1.24	5.21¡À0.43	6.84¡À1.22	4.15¡À0.46	3.71¡À0.53
5di	O=C2N3C(C(C=CC=C4)=C4C(NCCN5CCCCC5)=N3)=NC1=CC=C(Br)C=C12	3.81¡À0.47	4.14¡À0.86	7.85¡À2.53	4.48¡À0.69	2.01¡À0.83
5dj	O=C2N3C(C(C=CC=C4)=C4C(NCCN5CCOCC5)=N3)=NC1=CC=C(Br)C=C12	10.75¡À1.86	11.28¡À2.54	7.85¡À1.66	9.90¡À1.07	8.80¡À1.55
5dk	O=C2N3C(C(C=CC=C4)=C4C(NCCCC)=N3)=NC1=CC=C(Br)C=C12	>100	>100	>100	>100	>100
5dl	O=C2N3C(C(C=CC=C4)=C4C(NCCC(OCC)=O)=N3)=NC1=CC=C(Br)C=C12	>100	>100	>100	>100	>100
5dm	O=C2N3C(C(C=CC=C4)=C4C(NCC(OCC)=O)=N3)=NC1=CC=C(Br)C=C12	>100	>100	>100	>100	>100
